# Supplementary material for: Metamizole-Associated Adverse Events: A Systematic Review and Meta-Analysis
Source: PubMed Central journal article supplement (PMC4405027; doi:10.1371/journal.pone.0122918), 2015-04-13
Supplement: pone.0122918.s003.pdf [file pone.0122918.s003.pdf]

## Supplement 1: Search strategy

| Search terms for metamizole |                           |
|-----------------------------|---------------------------|
| 01. analginum.mp            | 29. metamizol\$.mp        |
| 02. algi.mp                 | 30. methampyron\$.mp      |
| 03. anador.mp               | 31. methanesulphonat\$.mp |
| 04. analgin\$.mp            | 32. methylmelubrin\$.mp   |
| 05. analgit.mp              | 33. (neo-melubrina).mp    |
| 06. baralgin.mp             | 34. (Neuro Fortamin).mp   |
| 07. berlosin.mp             | 35. nolotil\$.mp          |
| 08. conmel.mp               | 36. noramidopyrin\$.mp    |
| 09. dalmasin\$.mp           | 37. noraminophenazon\$.mp |
| 10. debela.mp               | 38. norgesic.mp           |
| 11. dipimax.mp              | 39. novalgin\$.mp         |
| 12. dipirona.mp             | 40. novamidazofen.mp      |
| 13. dipyrone/               | 41. novaminsulfon\$.mp    |
| 14. dipyrone.mp             | 42. optalgin\$.mp         |
| 15. dolgan.mp               | 43. phanalgin\$.mp        |
| 16. dornal .mp              | 44. pirazol\$.mp          |
| 17. dorona.mp               | 45. pirenil.mp            |
| 18. doran.mp                | 46. prodolina.mp          |
|                             | 47. pyranol\$.mp          |

|                   |                         |
|-------------------|-------------------------|
| 19. exalgin\$.mp  | 48. pyrethan\$.mp       |
| 20. inalgon\$.mp  | 49. pyril.mp            |
| 21. lasain.mp     | 50. pyron\$.mp          |
| 22. magnol.mp     | 51. (Spasmo Inalgon).mp |
| 23. magnopyrol.mp | 52. sulpyrin\$.mp       |
| 24. maxiliv.mp    | 53. suprim.mp           |
| 25. metilon.mp    | 54. terminal.mp         |
| 26. minalgin.mp   | 55. (V-Talgin).mp       |
| 27. mineral.mp    | 56. vegal.mp            |
| 28. melubrina.mp  | 57. zolidin\$.mp        |
