# Supplementary material for: Metamizole-Associated Adverse Events: A Systematic Review and Meta-Analysis
Source: PubMed Central journal article supplement (PMC4405027; doi:10.1371/journal.pone.0122918), 2015-04-13
Supplement: pone.0122918.s004.pdf [file pone.0122918.s004.pdf]

## Supplement 2

### Definitions used to classify trials according to components of methodological quality

| <i>Item</i>               | <i>Definition</i>                                                                                                                                                                                                                                                                        |
|---------------------------|------------------------------------------------------------------------------------------------------------------------------------------------------------------------------------------------------------------------------------------------------------------------------------------|
| Randomization             | We considered randomization adequate, if it was done using random number tables, computer-generated random numbers, minimization, coin tossing, shuffling cards, throwing dice, drawing of lots or other “simple randomization“ techniques.                                              |
| Concealment of allocation | We considered concealment of allocation adequate, if it was done using central allocation, sequentially numbered, opaque, sealed envelopes, sequentially numbered drug containers of identical appearance.                                                                               |
| Blinding of patients      | We considered blinding of patients adequate, if it was described as “double blind“.                                                                                                                                                                                                      |
| Adverse event assessment  | We considered adverse event assessment adequate, if it was done in a prospective and systematic way.                                                                                                                                                                                     |
| Dropouts / Exclusions     | We considered the risk of bias from dropouts / exclusions as “low” if - in case of a trial duration $\leq 48$ hours - the dropout rate was $\leq 10\%$ per group and the reasons for dropping out were reported and if – in case of a trial duration $> 48$ hours – the dropout rate was |

|                                            |                                                                                                                                                                  |
|--------------------------------------------|------------------------------------------------------------------------------------------------------------------------------------------------------------------|
|                                            | <p>≤20% per group and the reasons for dropping out were reported and an intention-to-treat analysis was conducted.</p>                                           |
| <p>Incomplete adverse event assessment</p> | <p>We considered adverse event assessment as “complete”, if all patients were assessed for adverse events.</p>                                                   |
| <p>Analyses</p>                            | <p>We considered statistical analyses to be adequate if all randomized patients were included in the analysis according to the intention-to-treat principle.</p> |
