# Supplementary material for: Metamizole-Associated Adverse Events: A Systematic Review and Meta-Analysis
Source: PubMed Central journal article supplement (PMC4405027; doi:10.1371/journal.pone.0122918), 2015-04-13
Supplement: pone.0122918.s005.pdf [file pone.0122918.s005.pdf]

## Supplement 4

### Methodological characteristics of the trials

| <b>Trial</b>       | <b>Randomization</b> | <b>Concealment</b> | <b>Blinding</b> | <b>Adverse events<br/>assessment</b> | <b>Dropouts /<br/>Exclusion</b> | <b>Incomplete<br/>adverse events<br/>assessment</b> | <b>Analyses</b> |
|--------------------|----------------------|--------------------|-----------------|--------------------------------------|---------------------------------|-----------------------------------------------------|-----------------|
| <b>Ajgaonkar</b>   | unclear              | unclear            | adequate        | unclear                              | unclear                         | unclear                                             | no              |
| <b>Arnau</b>       | adequate             | unclear            | adequate        | no                                   | adequate                        | adequate                                            | no              |
| <b>Atalay</b>      | unclear              | unclear            | no              | no                                   | adequate                        | adequate                                            | adequate        |
| <b>Babej-Dölle</b> | adequate             | adequate           | no              | no                                   | adequate                        | adequate                                            | adequate        |
| <b>Bagan</b>       | unclear              | unclear            | adequate        | no                                   | unclear                         | adequate                                            | no              |
| <b>Bigal</b>       | adequate             | unclear            | adequate        | unclear                              | adequate                        | unclear                                             | no              |
| <b>Bilgin</b>      | unclear              | unclear            | no              | unclear                              | unclear                         | unclear                                             | no              |
| <b>Blendinger</b>  | unclear              | unclear            | no              | no                                   | adequate                        | adequate                                            | adequate        |

|                           |          |          |          |          |          |          |          |
|---------------------------|----------|----------|----------|----------|----------|----------|----------|
| <b>Bloch</b>              | unclear  | adequate | adequate | no       | no       | adequate | adequate |
| <b>Boraks</b>             | unclear  | unclear  | adequate | unclear  | unclear  | unclear  | no       |
| <b>Braun</b>              | unclear  | unclear  | adequate | adequate | unclear  | adequate | no       |
| <b>Brodner</b>            | adequate | adequate | adequate | adequate | adequate | adequate | adequate |
| <b>Castro</b>             | unclear  | unclear  | adequate | unclear  | unclear  | no       | no       |
| <b>Castro Gonzales</b>    | unclear  | unclear  | adequate | unclear  | unclear  | no       | no       |
| <b>Cruz</b>               | unclear  | unclear  | no       | unclear  | adequate | adequate | adequate |
| <b>De Miguel Rivero</b>   | unclear  | adequate | adequate | no       | adequate | adequate | no       |
| <b>Diaz-Chavez</b>        | adequate | unclear  | no       | unclear  | unclear  | unclear  | no       |
| <b>Dos Santos Pereira</b> | unclear  | unclear  | no       | unclear  | adequate | adequate | adequate |
| <b>Duarte Souza</b>       | unclear  | unclear  | adequate | no       | adequate | adequate | adequate |
| <b>Fernandes Filho</b>    | unclear  | unclear  | adequate | unclear  | adequate | adequate | adequate |

---

|                         |          |          |          |          |          |          |          |
|-------------------------|----------|----------|----------|----------|----------|----------|----------|
| <b>Ferrario</b>         | unclear  | unclear  | no       | unclear  | adequate | adequate | no       |
| <b>Gomes-Marquez</b>    | adequate | unclear  | no       | unclear  | no       | no       | no       |
| <b>Gonzalez-Garcia</b>  | unclear  | unclear  | adequate | no       | unclear  | adequate | adequate |
| <b>Grundmann</b>        | adequate | adequate | adequate | adequate | adequate | adequate | adequate |
| <b>Guberti</b>          | unclear  | unclear  | no       | unclear  | adequate | unclear  | no       |
| <b>Hernandez Llenas</b> | unclear  | unclear  | no       | unclear  | adequate | adequate | adequate |
| <b>Herrera Barroso</b>  | unclear  | adequate | adequate | unclear  | adequate | adequate | adequate |
| <b>Ibarra-Ibarra</b>    | unclear  | unclear  | adequate | unclear  | adequate | adequate | adequate |
| <b>Jage</b>             | unclear  | unclear  | no       | no       | adequate | adequate | adequate |
| <b>Jovic</b>            | unclear  | unclear  | no       | no       | adequate | adequate | adequate |
| <b>Kampe</b>            | adequate | adequate | adequate | adequate | adequate | adequate | adequate |
| <b>Karaman</b>          | unclear  | adequate | adequate | adequate | adequate | adequate | adequate |

---

|                        |          |          |          |          |          |          |          |
|------------------------|----------|----------|----------|----------|----------|----------|----------|
| <b>Kemal</b>           | unclear  | unclear  | no       | unclear  | unclear  | unclear  | no       |
| <b>Knüsel</b>          | unclear  | unclear  | adequate | no       | no       | no       | no       |
| <b>Krymchantowski</b>  | no       | unclear  | no       | no       | adequate | adequate | adequate |
| <b>Landwehr</b>        | adequate | adequate | adequate | adequate | unclear  | no       | no       |
| <b>Lehmann</b>         | adequate | unclear  | adequate | unclear  | adequate | adequate | adequate |
| <b>Lehtonen</b>        | unclear  | unclear  | no       | no       | adequate | adequate | adequate |
| <b>Marin-Bertolin</b>  | unclear  | unclear  | adequate | no       | unclear  | adequate | no       |
| <b>Martin-Duce</b>     | unclear  | unclear  | adequate | no       | unclear  | no       | no       |
| <b>Martinez-Martin</b> | adequate | unclear  | adequate | adequate | no       | adequate | no       |
| <b>Mateu</b>           | unclear  | unclear  | adequate | unclear  | unclear  | no       | no       |
| <b>Mehta</b>           | unclear  | unclear  | adequate | unclear  | unclear  | no       | no       |
| <b>Monso</b>           | unclear  | unclear  | adequate | no       | adequate | adequate | adequate |

---

|                        |          |         |          |         |          |          |          |
|------------------------|----------|---------|----------|---------|----------|----------|----------|
| <b>Muriel</b>          | unclear  | unclear | adequate | no      | unclear  | unclear  | no       |
| <b>Muriel-Villoria</b> | unclear  | unclear | adequate | no      | unclear  | unclear  | no       |
| <b>Ocampo Flores</b>   | unclear  | unclear | adequate | unclear | no       | no       | no       |
| <b>Pardo</b>           | unclear  | unclear | no       | unclear | adequate | adequate | adequate |
| <b>Patel</b>           | unclear  | unclear | adequate | unclear | unclear  | unclear  | no       |
| <b>Pavlik</b>          | adequate | unclear | adequate | no      | adequate | adequate | adequate |
| <b>Peiró</b>           | adequate | unclear | no       | no      | unclear  | unclear  | no       |
| <b>Pernia</b>          | unclear  | unclear | adequate | unclear | adequate | adequate | adequate |
| <b>Pinto</b>           | unclear  | unclear | adequate | unclear | adequate | adequate | adequate |
| <b>Planas</b>          | adequate | unclear | adequate | no      | unclear  | no       | no       |
| <b>Prada</b>           | unclear  | no      | adequate | unclear | adequate | unclear  | no       |
| <b>Primus</b>          | unclear  | no      | no       | no      | unclear  | unclear  | no       |

---

|                                 |          |          |          |          |          |          |          |
|---------------------------------|----------|----------|----------|----------|----------|----------|----------|
| <b>Rawal</b>                    | adequate | adequate | adequate | adequate | no       | adequate | adequate |
| <b>Rejman</b>                   | unclear  | unclear  | no       | unclear  | adequate | adequate | adequate |
| <b>Reyes</b>                    | adequate | unclear  | adequate | no       | adequate | adequate | adequate |
| <b>Reyes-Armijo</b>             | unclear  | unclear  | adequate | unclear  | adequate | unclear  | adequate |
| <b>Rodriguez</b>                | unclear  | unclear  | adequate | adequate | unclear  | unclear  | no       |
| <b>Rubinstein</b>               | unclear  | unclear  | adequate | unclear  | adequate | adequate | adequate |
| <b>Sanchez-Carpena<br/>2003</b> | adequate | unclear  | adequate | no       | adequate | adequate | adequate |
| <b>Sanchez-Carpena<br/>2007</b> | adequate | adequate | adequate | no       | adequate | adequate | adequate |
| <b>Saray</b>                    | unclear  | adequate | adequate | adequate | unclear  | adequate | no       |
| <b>Savoca</b>                   | unclear  | unclear  | no       | unclear  | adequate | unclear  | no       |
| <b>Schmieder</b>                | unclear  | unclear  | no       | no       | unclear  | adequate | no       |

---

|                          |          |          |          |          |          |          |          |
|--------------------------|----------|----------|----------|----------|----------|----------|----------|
| <b>Sener</b>             | adequate | unclear  | adequate | unclear  | unclear  | adequate | adequate |
| <b>Spacek</b>            | adequate | adequate | adequate | adequate | adequate | adequate | adequate |
| <b>Stankov 1994</b>      | unclear  | unclear  | adequate | no       | unclear  | adequate | no       |
| <b>Stankov 1995</b>      | adequate | unclear  | no       | no       | adequate | unclear  | adequate |
| <b>Steffen</b>           | adequate | unclear  | adequate | no       | adequate | adequate | adequate |
| <b>Striebel</b>          | unclear  | unclear  | adequate | no       | unclear  | unclear  | no       |
| <b>Tempel</b>            | unclear  | adequate | adequate | no       | adequate | adequate | adequate |
| <b>Tonolli Jacob</b>     | unclear  | unclear  | adequate | unclear  | adequate | adequate | adequate |
| <b>Torres 1993</b>       | unclear  | unclear  | adequate | adequate | adequate | adequate | adequate |
| <b>Torres 2001</b>       | adequate | unclear  | adequate | no       | adequate | unclear  | adequate |
| <b>Uzun</b>              | adequate | unclear  | adequate | adequate | adequate | adequate | adequate |
| <b>Vargha von Szeged</b> | unclear  | unclear  | no       | no       | adequate | adequate | adequate |

---
