# Supplementary material for: Metamizole-Associated Adverse Events: A Systematic Review and Meta-Analysis
Source: PubMed Central journal article supplement (PMC4405027; doi:10.1371/journal.pone.0122918), 2015-04-13
Supplement: pone.0122918.s006.pdf [file pone.0122918.s006.pdf]

## Supplement 5

### Label of variables used in Supplement 6 (Dataset of all outcomes provided for each study separately)

The variable names should be interpreted as following:

“yes” concerns the number of individuals that experienced the event;

“no” concerns the number of individuals that did not experience the event;

the number that comes at the end of variable names indicate the intervention:

(1) Metamizole

(2) Placebo

(3) Aspirin

(4) NSAID

(5) Opioid

(6) Paracetamol

AE: adverse event; SAE serious adverse event.
